# Supplementary material for: Interferon-γ derived from cytotoxic lymphocytes directly enhances their motility and cytotoxicity
Source: PubMed Central journal article supplement (PMC5520949; doi:10.1038/cddis.2017.67), 2017-06-01

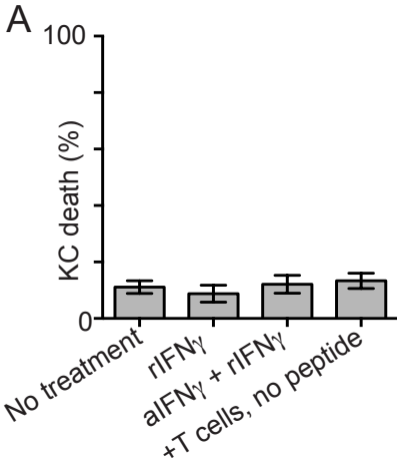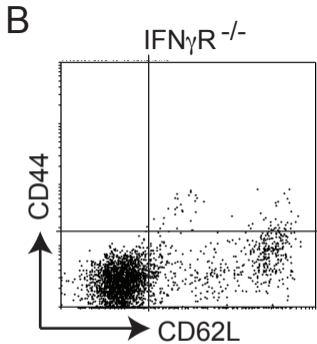

Supplement: cddis201767x1.pdf [file cddis201767x1.pdf]
